# Supplementary material
Source: HighWire-hosted journal article supplement (http://www.cmaj.ca/highwire/filestream/59249/field_highwire_adjunct_files/0/185_14.pdf)
Supplement: 185_14.pdf [file 185_14.pdf]

## ÉDITORIAL

## Pour une meilleure gestion de la douleur chez les personnes atteintes de démence

Ken Flegel MDCM MSc

Pour la version anglaise de l'éditorial, veuillez consulter la page 1195.

Voir aussi l'article de recherche de Prorok et ses collaborateurs à la page 1215 et à [www.cmaj.ca/lookup/doi/10.1503/cmaj.121795](http://www.cmaj.ca/lookup/doi/10.1503/cmaj.121795)

**I**l faut rejeter toute notion selon laquelle les personnes atteintes de démence ressentiraient moins la douleur. La prévalence de la douleur chronique est à tout le moins aussi importante chez elles (jusqu'à la moitié) que chez les autres personnes âgées<sup>1-3</sup>. En outre, sa fréquence ne change pas avec la gravité du déficit cognitif<sup>4</sup>. Cependant, la détection de la douleur chronique est généralement plus faible au sein de cette population et, par conséquent, la douleur est mal prise en charge<sup>5,6</sup>. Cette incapacité à détecter la douleur est plus apparente chez les personnes ayant de graves troubles cognitifs<sup>6</sup>. Or, il sera de plus en plus important de combler cet écart dans les soins parce qu'au cours des prochaines décennies, les personnes âgées représenteront un quart de la population du Canada, et plus d'un million d'entre elles seront atteintes de démence.

La douleur chez les personnes âgées est principalement due à une maladie dégénérative des articulations et de la colonne vertébrale, aux douleurs neuropathiques, à des fractures et au cancer. Elle est associée à une déficience fonctionnelle, à des sautes d'humeur, à des troubles du sommeil, au manque d'appétit et à une augmentation de l'utilisation des soins de santé. Les personnes âgées perçoivent la douleur différemment parce qu'elles ont moins de petites fibres de la douleur. Il en résulte que leur seuil de douleur aux stimuli nuisibles périphériques est plus élevé. Cependant, elles tolèrent aussi moins bien la douleur que les personnes plus jeunes en raison d'une baisse des récepteurs opioïdes endogènes dans le cerveau<sup>7</sup>. Il semblerait également y avoir des preuves d'hypersensibilisation et d'hyperalgésie liées à l'âge subséquente à une blessure<sup>7</sup>. Comme il est difficile de faire des recherches sur la douleur chez les personnes atteintes de démence, il est difficile de connaître la portée concrète de cette nouvelle information, en particulier chez les personnes atteintes de démence grave. Il n'en demeure pas moins que les preuves accumulées indiquent que ces personnes souffrent tout autant que les personnes plus jeunes.

La douleur est un symptôme, une question d'évaluation subjective et de signalement, mais les personnes atteintes de démence peuvent avoir du mal à la signaler. Cependant, des méthodes peuvent être utilisées pour détecter et surveiller la douleur et son intensité, au moins chez les personnes atteintes de démence modérée. Ces méthodes utilisent des échelles

d'auto-évaluation verbales et visuelles, des photos de visage et l'observation de la posture au chevet du patient, la protection, l'expression du visage et le comportement lors des activités quotidiennes<sup>4,5</sup>. D'autres méthodes à l'étude pour évaluer la douleur chez les adultes gravement malades qui ne peuvent signaler eux-mêmes la douleur<sup>8</sup> sont prometteuses pour gérer la douleur chez les personnes atteintes de démence qui ne peuvent communiquer.

Les personnes atteintes de démence tolèrent moins bien les opiacés et d'autres analgésiques chimiques systémiques à une dose et une fréquence qui pourront soulager leur douleur. Leur volume de distribution est plus petit en raison de leurs corps atrophiés. Un cerveau atrophié est plus sensible aux effets cognitifs négatifs des analgésiques à action centrale. Un foie âgé métabolise moins bien les stupéfiants, et des reins âgés prennent plus de temps à excréter les métabolites. Les comorbidités nécessitent l'utilisation d'autres types de médicaments, ce qui suscite des interactions médicamenteuses. C'est pourquoi certains patients ont besoin de l'expertise de spécialistes en médecine de la douleur, qui sont peu nombreux en ce moment. La physiothérapie, la thérapie comportementale, les massages, les blocs nerveux et la contre-stimulation sont des approches prometteuses qui doivent être étudiées plus en profondeur. Nous devons aussi chercher à déterminer comment mesurer les résultats pertinents pour les patients. Compte tenu de ce besoin d'améliorer les connaissances, il est préoccupant de constater que les personnes très âgées, les résidents des établissements de soins de longue durée et les personnes atteintes de démence sont systématiquement exclus des essais randomisés.

Les aspects très personnels et quotidiens de ce type de soins pour les personnes atteintes de démence, et plus particulièrement l'évaluation et le contrôle efficaces de la douleur, suggèrent que les caractéristiques des soins au chevet énoncées ci-après s'imposent. Le fournisseur de soins de santé affecté à cette tâche (généralement l'infirmière) devrait bien connaître le patient et être la personne qui fournit le plus régulièrement les soins au chevet. Le fournisseur doit être bien formé et bien connaître les méthodes modernes d'évaluation de la douleur et d'intervention. Il faut également accorder au fournisseur, dans les limites du protocole, plus de latitude pour modifier la fréquence et le dosage de certains traitements de la douleur.

D'après ce que nous savons déjà, il semble évident que si l'on veut répondre aux besoins en matière de soulagement de la douleur chez les personnes atteintes de démence, il faudra davantage de soins spécialisés au chevet de chaque patient. Ce qui est le plus nécessaire, cependant, c'est une approche attentive axée sur la personne. Une personne atteinte de démence peut être en train de perdre sa capacité cognitive, mais certains aspects de sa personnalité doivent toujours être respectés — à savoir la dignité, l'histoire de vie et les liens avec la famille<sup>3</sup>. À cette liste il convient d'ajouter la perception de la douleur et de la souffrance. Nous avons suffisamment de preuves et une obligation professionnelle de maîtriser la douleur chez les personnes atteintes de démence. Elles ne sont pas des non personnes et ne doivent pas être prises en charge comme si c'était le cas. Dans la mesure où nous, en tant que soignants, traitons une personne atteinte de démence comme une non personne, la relation thérapeutique et la qualité de personne de l'aidant s'en trouvent également diminuées<sup>3</sup>.

## Références

1. Proctor WR, Hirdes JP. Pain and cognitive status among nursing home residents in Canada. *Pain Res Manag* 2001;6:119-25.
2. Ramage-Morin PL. Chronic pain in Canadian seniors. *Health Rep* 2008;19:37-52.
3. Malloy DC, Hadjistavropoulos T. The problem of pain management among persons with dementia, personhood, and the ontology of relationships. *Nurs Philos* 2004;5:147-59.
4. Pautex S, Hermann F, Le Louis P, et al. Feasibility and reliability of four pain self-assessment scales and correlation with an observational rating scale in hospitalized elderly demented persons. *J Gerontol A Biol Sci Med Sci* 2005;60:524-9.
5. Fisher SE, Burgio LD, Thom BE, et al. Pain assessment and management in cognitively impaired nursing home residents: association of certified nursing assistant report, Minimum Data Set pain report, and analgesic medication use. *J Am Geriatr Soc* 2002;50:152-6.
6. Cohen-Mansfield J, Lipson S. Pain in cognitively impaired nursing home residents: how well are physicians diagnosing it? *J Am Geriatr Soc* 2002;50:1039-44.
7. Gibson SJ, Farrell M. A review of age differences in the neurophysiology of nociception and the perceptual experience of pain. *Clin J Pain* 2004;20:227-39.
8. Rose L, Haslam L, Dale C, et al. Behavioural pain assessment tool for critically ill adults unable to self-report pain. *Am J Crit Care* 2013;22:246-55.

**Intérêts concurrents :** Se rendre à [www.cmaj.ca/site/misc/cmaj\\_staff.xhtml](http://www.cmaj.ca/site/misc/cmaj_staff.xhtml)

**Affiliations :** Ken Flegel est rédacteur associé principal, JAMC.

**Correspondance à :** Éditeur du JAMC, [pubs@cmaj.ca](mailto:pubs@cmaj.ca)

## RÉSUMÉS DE RECHERCHE

# L'expérience des soins de santé chez les personnes atteintes de démence et leurs aidants : méta-analyse ethnographique d'études qualitatives

Jeanette C. Prorok MSc, Salinda Horgan PhD, Dallas P. Seitz MD

Pour la version anglaise de ce résumé, veuillez consulter la page 1215.

Voir aussi l'éditorial en anglais de Flegel à la page 1195 et à [www.cmaj.ca/lookup/doi/10.1503/cmaj.131296](http://www.cmaj.ca/lookup/doi/10.1503/cmaj.131296)

**Intérêts concurrents :**  
Aucun déclaré.

Cet article a été revu par les pairs.

**Correspondance à :** Dallas P. Seitz,  
[seitzd@providencecare.ca](mailto:seitzd@providencecare.ca)

**Contexte :** Compte tenu du nombre croissant de personnes touchées, il devient de plus en plus important de cerner l'expérience des patients atteints de démence et de leurs aidants en ce qui concerne les soins de santé. Nous avons procédé à une revue systématique des études qualitatives qui se sont penchées sur les divers aspects des soins de santé utilisés par les personnes atteintes de démence et leurs aidants dans le but de mieux comprendre de quelle façon améliorer les soins prodigués à cette population.

**Méthodes :** Nous avons interrogé les bases de données électroniques MEDLINE, Embase, PsychINFO et CINAHL pour relever les articles pertinents. Nous avons extrait les caractéristiques clés et les méthodes des études incluses. Nous avons aussi extrait des citations directes des études principales, de même que les interprétations proposées par leurs auteurs. Nous avons utilisé la méta-ethnographie pour synthétiser l'information extraite dans un cadre global. Nous avons évalué la qualité des études principales à l'aide des critères COREQ (*Consolidated Criteria for Reporting Qualitative Research*).

**Résultats :** En tout, 46 études répondaient à nos critères d'inclusion; elles portaient sur 1866 personnes atteintes de démence et leurs aidants. Nous avons recensé 5 thèmes majeurs : obtention du diagnostic, accès au soutien et aux services, recherche de renseignements, gestion de la maladie et communication et attitudes des professionnels de la santé. Nous avons conceptualisé l'expérience des soins de santé comme un cheminement en phases successives : recherche et compréhension des renseignements, reconnaissance du problème, transformation des rôles une fois le diagnostic posé et adaptation au changement.

**Interprétation :** L'expérience des soins de santé chez les personnes atteintes de démence et leurs aidants est un processus complexe et dynamique qui pourrait être amélioré pour bien des gens. Comprendre cette expérience permet de reconnaître les lacunes des services de santé existants. Modifier ces services ou appliquer de nouveaux modèles de soins permettrait de combler ces lacunes et pourrait améliorer les résultats chez les personnes atteintes de démence et leurs aidants.
